# Supplementary material for: TiO2 with controllable oxygen vacancies for efficient isopropanol degradation: photoactivity and reaction mechanism
Source: Royal Society of Chemistry journal article supplement (doi:10.1039/d1cy00417d), 2021-01-01
Supplement: d1cy00417d1.pdf [file d1cy00417d1.pdf]

Supporting Information

**TiO<sub>2</sub> with controllable oxygen vacancy for efficient isopropanol degradation: photoactivity and reaction mechanism**

Shuyang Wu,<sup>a, b, †</sup> Kana Ishisone,<sup>c, †</sup> Yuan Sheng,<sup>a, b</sup> Manoel Y. Manuputty,<sup>a, b</sup> Markus Kraft,<sup>b, d</sup> Rong Xu\*,<sup>a, b</sup>

<sup>a</sup> School of Chemical and Biomedical Engineering, Nanyang Technological University, 62 Nanyang Drive, Singapore 637459, Singapore

<sup>b</sup> C4T CREATE, National Research Foundation, CREATE Tower 1 Create Way, Singapore 138602, Singapore

<sup>c</sup> Department of Materials Science and Engineering, Graduate School of Materials and Chemical Technology, Tokyo Institute of Technology, 2-12-1 O-okayama, Meguro, Tokyo, 152-8552, Japan

<sup>d</sup> Department of Chemical Engineering and Biotechnology, University of Cambridge, West Cambridge Site, Philippa Fawcett Drive, Cambridge CB3 0AS, United Kingdom

<sup>†</sup> These authors contributed equally to this work.

Corresponding Author

E-mail: [rxu@ntu.edu.sg](mailto:rxu@ntu.edu.sg)

The supporting information contains:

Number of pages: 14

Number of figures: 14

Number of tables: 5

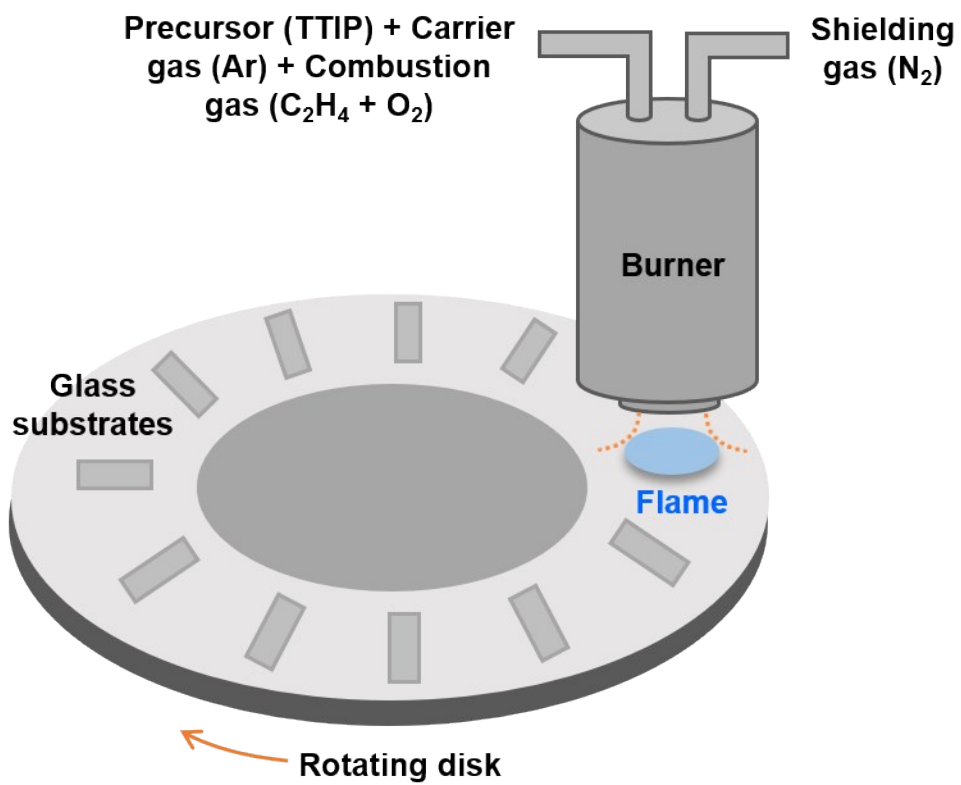

46

47 **Fig. S1** Schematic illustration of TiO<sub>2</sub> nanoparticles prepared by FSRS method.

48

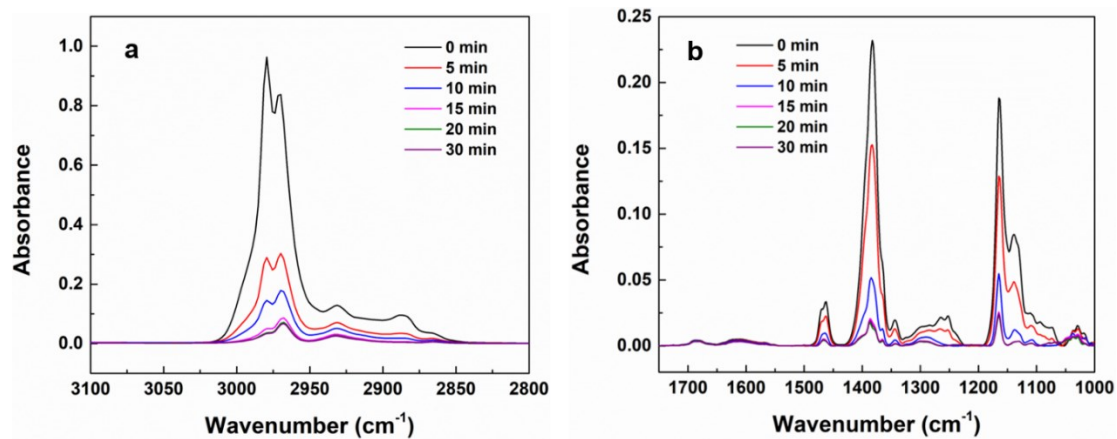

49

50 **Fig. S2** (a, b) *In situ* DRIFTS spectra for IPA desorption on TiO<sub>2-x</sub>-20 min under the dark which indicate  
51 that the steady-state can be reached at 15 min.

52

53

54

55

56

57

58

59

60

61

62

63

64

65

66

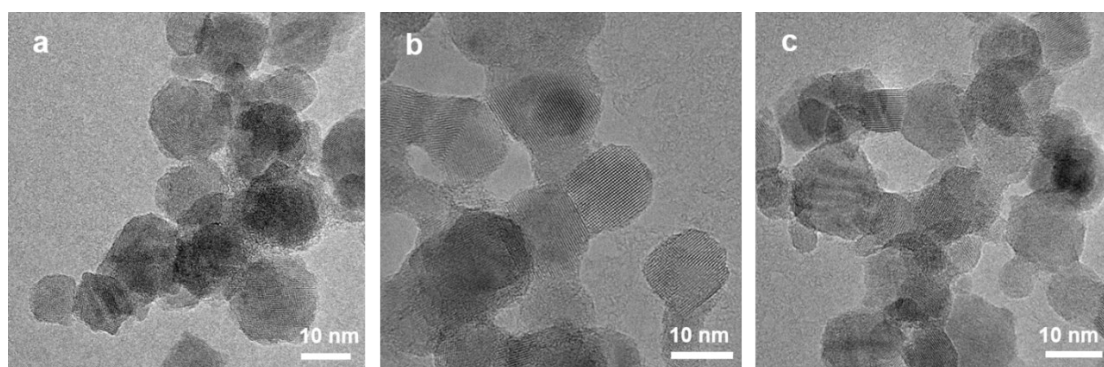

67

68 **Fig. S3** TEM images of (a) TiO<sub>2-x</sub>-4 min, (b) TiO<sub>2-x</sub>-8 min and (c) TiO<sub>2-x</sub>-35 min.

69

70

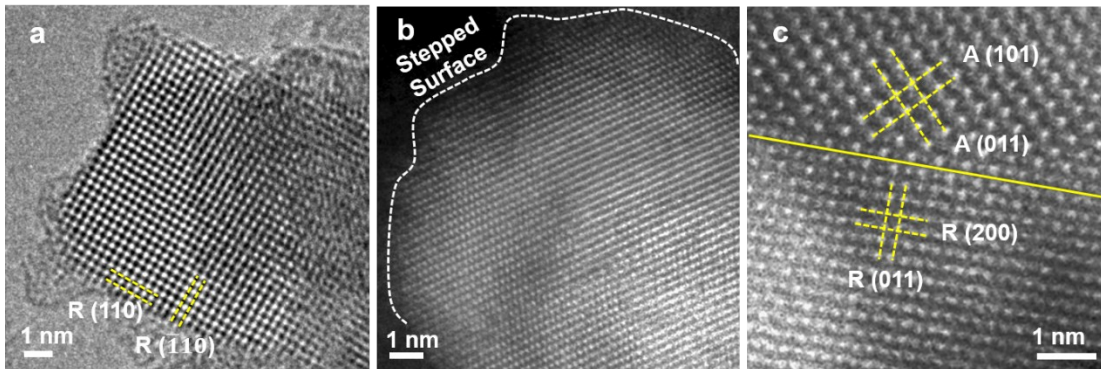

71  
 72 **Fig. S4** Atomic-resolution TEM and STEM analysis of  $\text{TiO}_{2-x}$ -20 min. (a) Atomic-resolution TEM image of  
 73  $\text{TiO}_{2-x}$ -20 min with rutile (110) and  $(\bar{1}10)$  facets co-present. Aberration-corrected HAADF-STEM images of  
 74  $\text{TiO}_{2-x}$ -20 min (b) with stepped surface, and (c) with anatase-rutile hetero-phase junction.

75  
 76  
 77  
 78  
 79  
 80  
 81  
 82  
 83  
 84  
 85  
 86  
 87

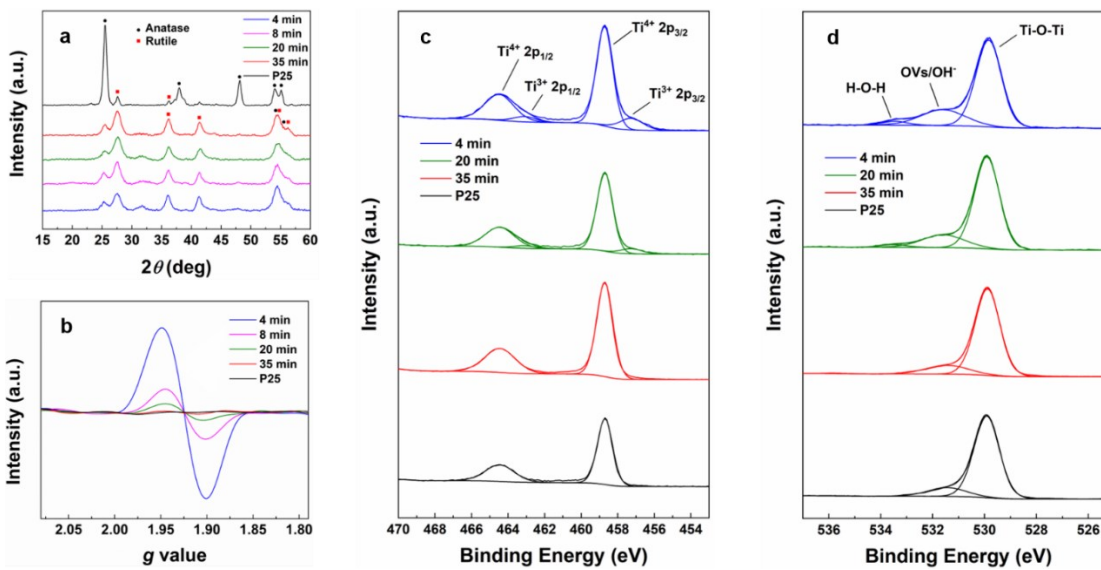

88  
 89 **Fig. S5** (a) XRD patterns, (b) EPR spectra. XPS spectra of (c) Ti 2p and (d) O 1s.  
 90

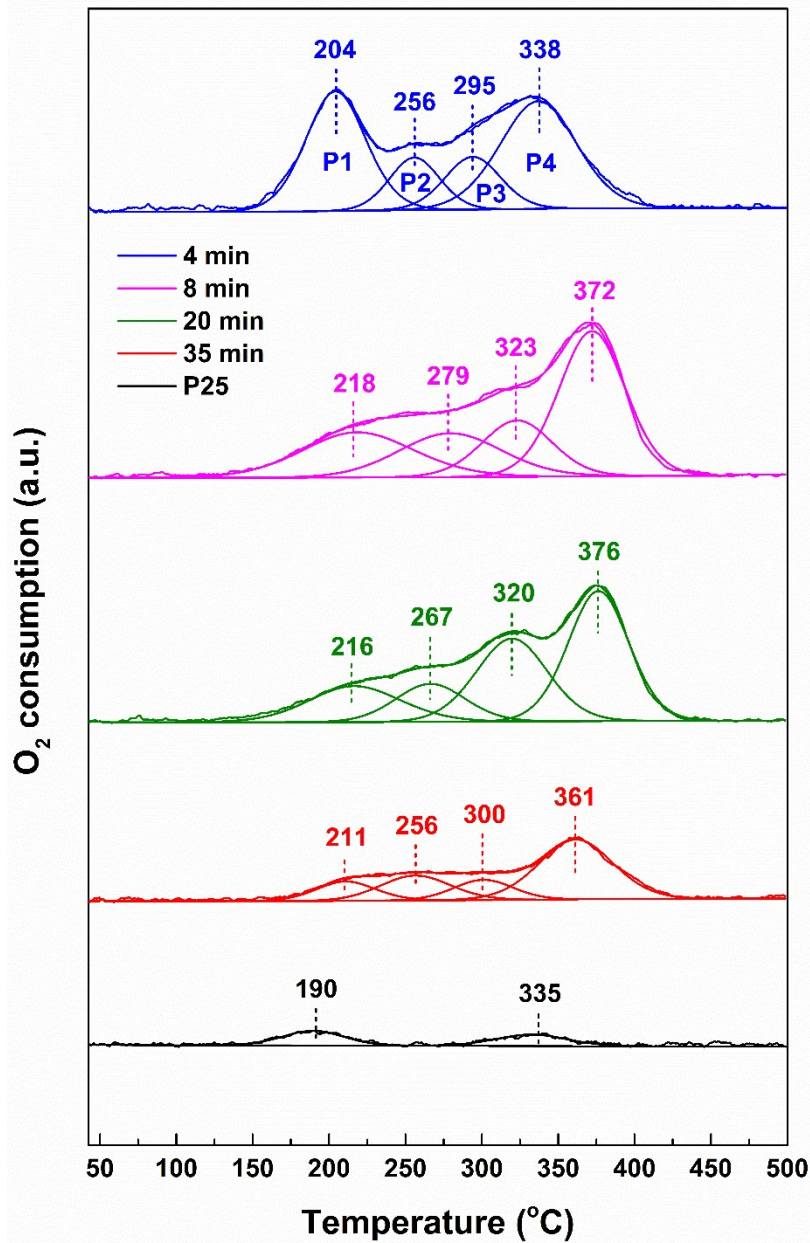

91  
 92 **Fig. S6** TPO profiles flame-made TiO<sub>2-x</sub> and P25 TiO<sub>2</sub>.  
 93

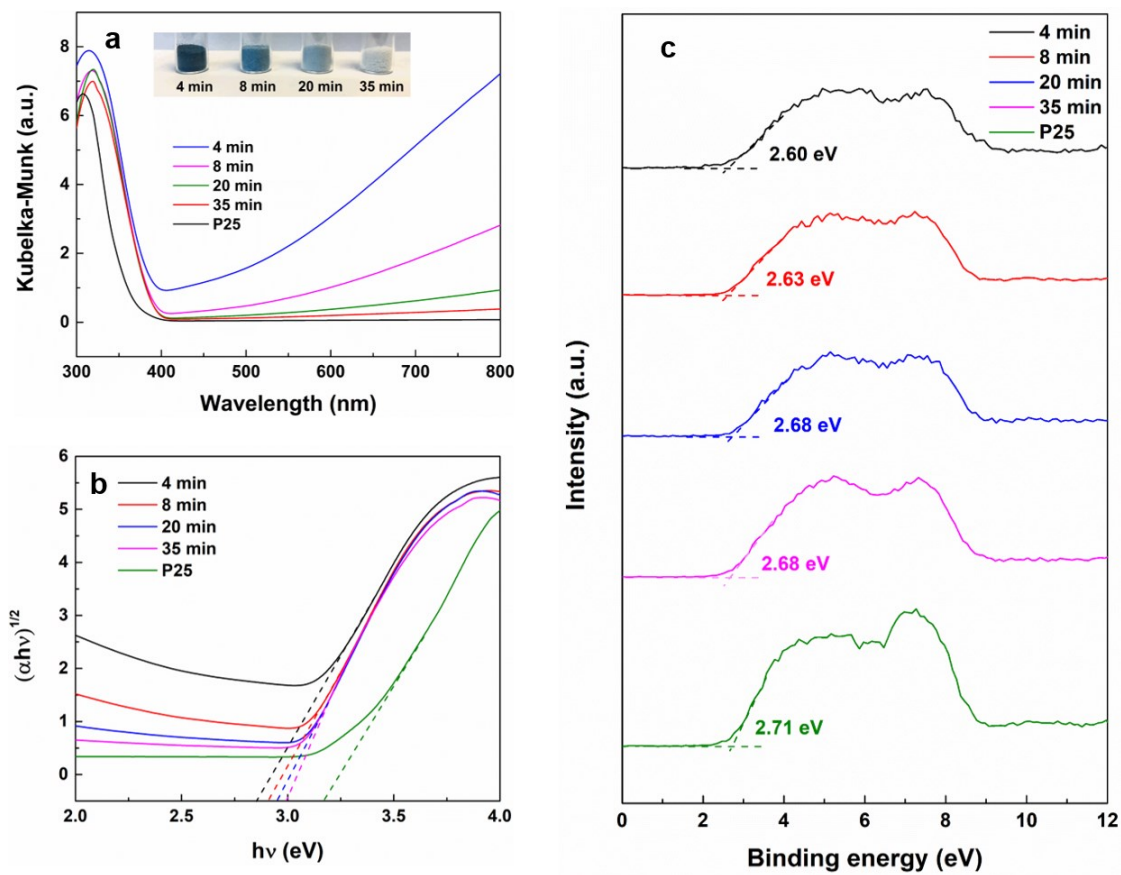

94 **Fig. S7** (a) UV-Vis DRS spectra (inset: picture of flame-made samples), (b) Bandgap analysis and (c)  
 95 Valence band position of flame-made  $\text{TiO}_{2-x}$  and P25  $\text{TiO}_2$ .  
 96  
 97  
 98  
 99



100

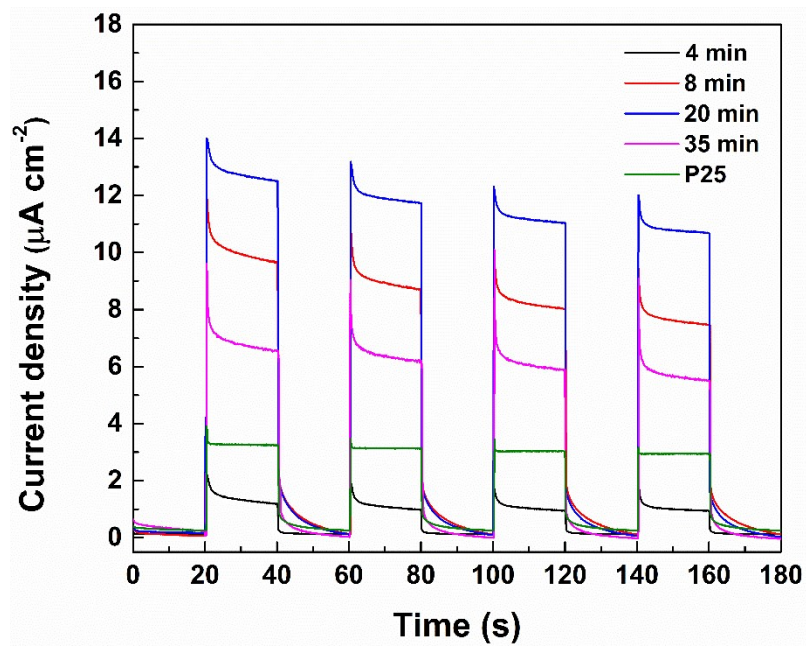

101

102

103

Fig. S8 Transient photocurrent density of flame-made  $\text{TiO}_{2-x}$  and P25  $\text{TiO}_2$ .

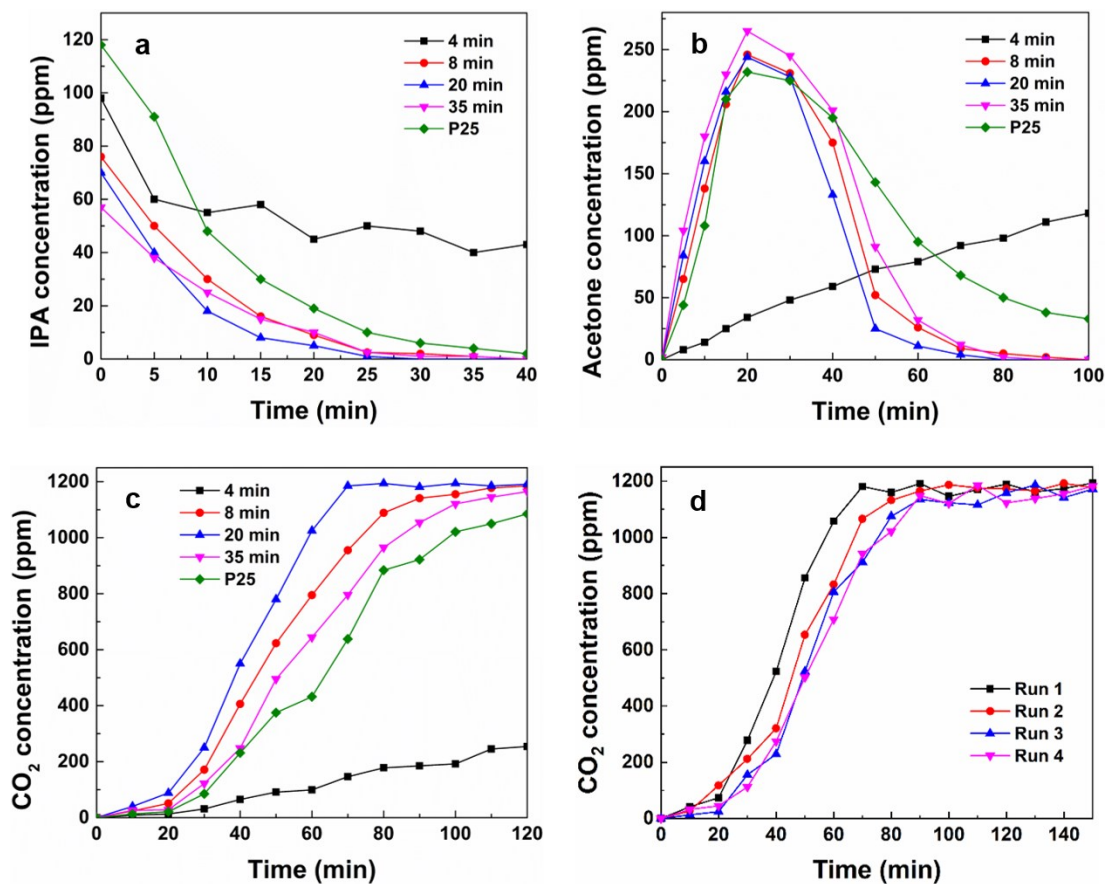

104  
 105 **Fig. S9** (a) Photocatalytic IPA degradation, (b) Acetone production, and (c) CO<sub>2</sub> generation over flame-made  
 106 TiO<sub>2-x</sub> and P25 TiO<sub>2</sub>. (d) Stability test of TiO<sub>2-x</sub>-20 min (40 mg of TiO<sub>2</sub>, 400 ppm initial IPA concentration,  
 107 300 W Xe lamp).  
 108  
 109  
 110  
 111

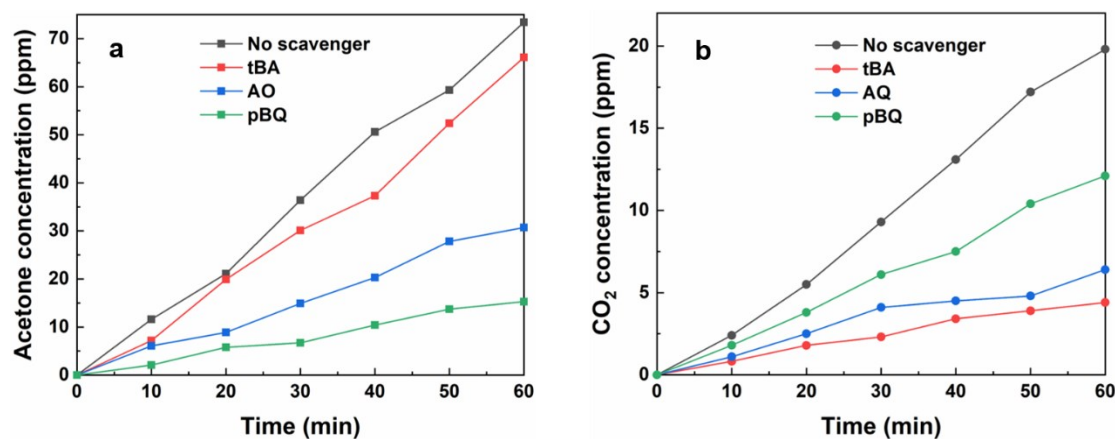

112  
 113 **Fig. S10** IPA photodegradation over TiO<sub>2-x</sub>-20 min with different scavengers. (a) Acetone evolution amount;  
 114 (b) CO<sub>2</sub> generation amount (40 mg of TiO<sub>2</sub>, 400 ppm initial IPA concentration, 20% O<sub>2</sub> concentration, 75%  
 115 RH, 150 W Xe lamp, > 400 nm).  
 116



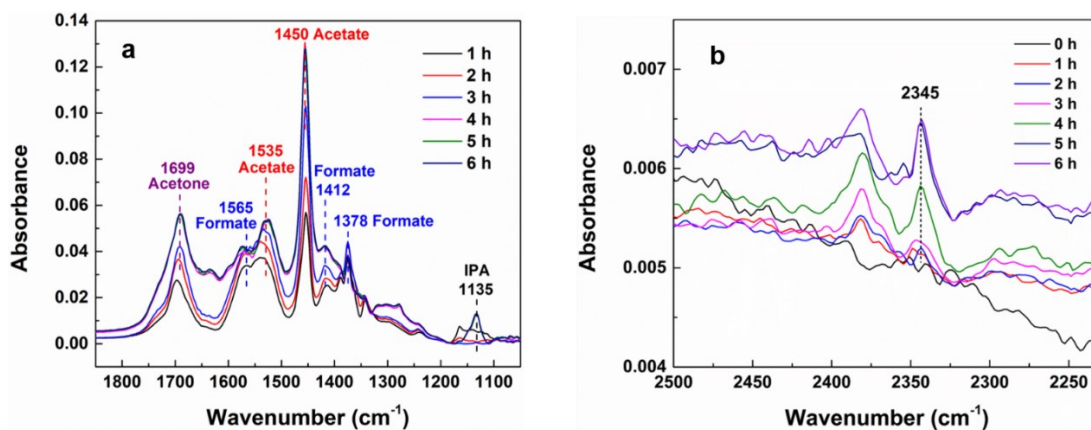

117  
 118 **Fig. S11** *In situ* DRIFTS spectra for  $\text{TiO}_{2-x}$ -20 min under light illumination (300 W Xe lamp, > 400 nm) for  
 119 6 h in the range of (a) 1050-1850  $\text{cm}^{-1}$  and (b) 2230-2500  $\text{cm}^{-1}$ .  
 120  
 121  
 122  
 123  
 124  
 125  
 126  
 127  
 128  
 129  
 130  
 131  
 132

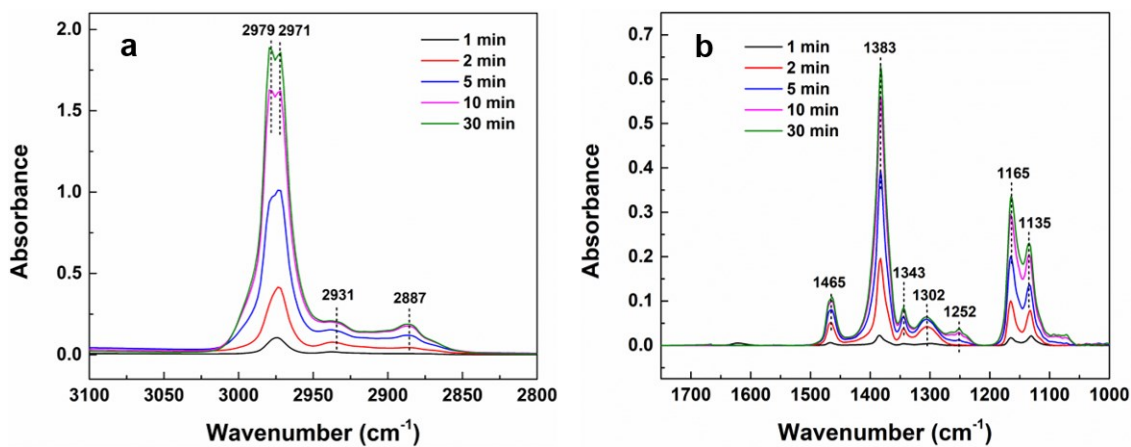

133  
 134 **Fig. S12** *In situ* DRIFTS spectra of (a,b) P25  $\text{TiO}_2$  in the dark after purging with IPA

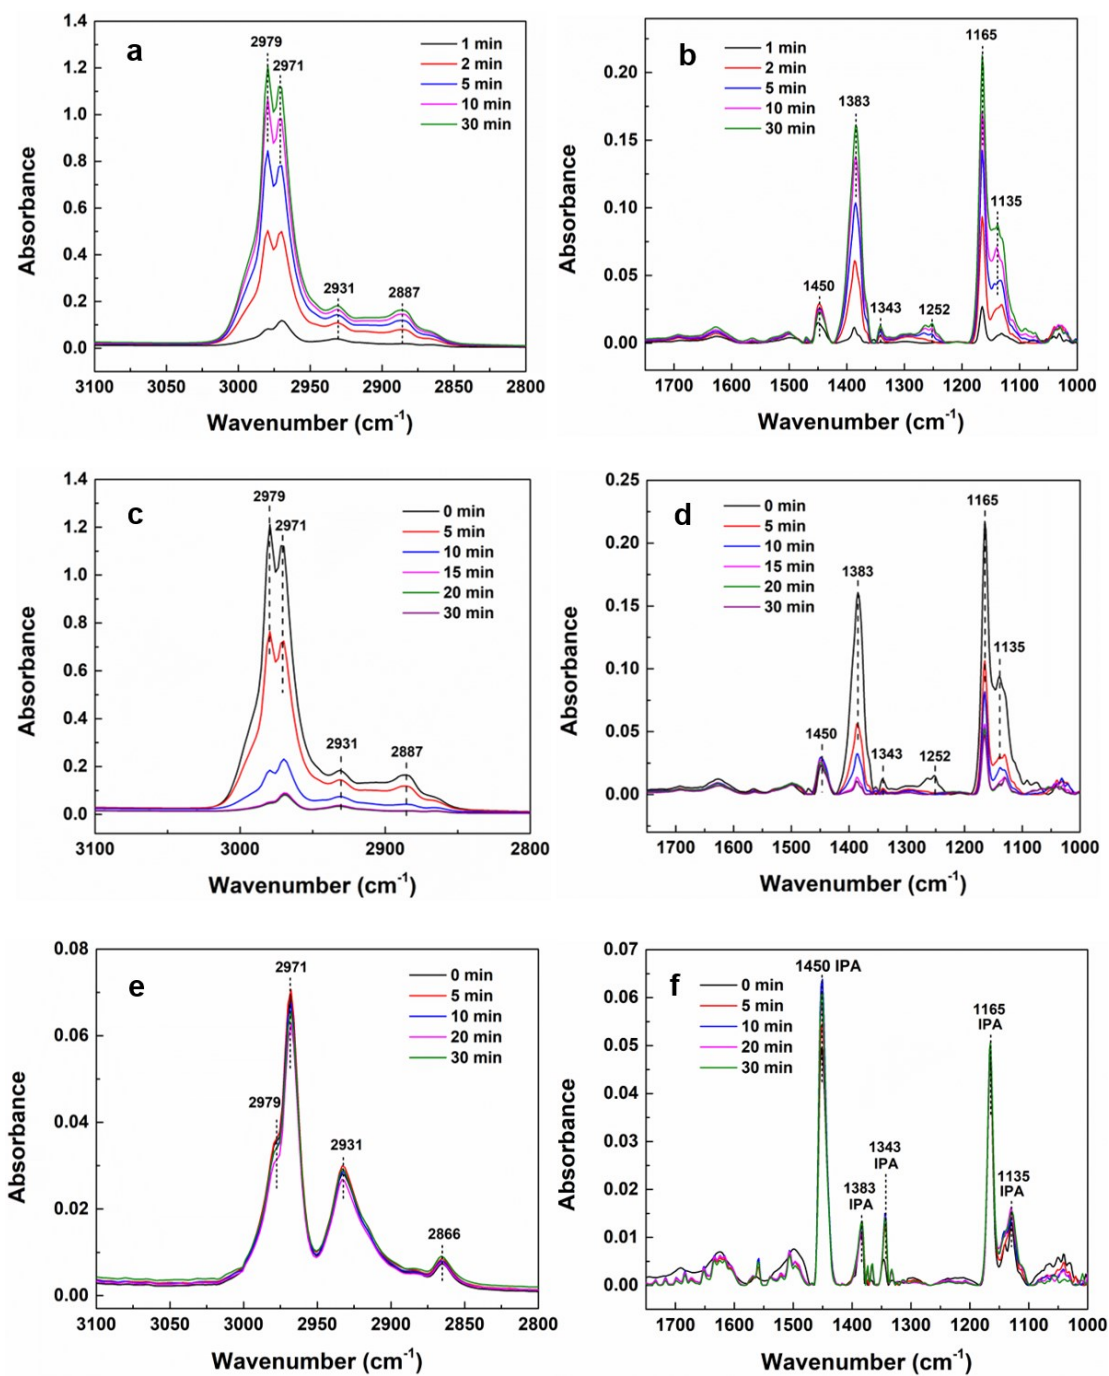

135  
 136 **Fig. S13** *In situ* DRIFTS spectra for  $\text{TiO}_{2-x}$ -4 min under the dark adsorption (a) and (b); dark desorption (c)  
 137 and (d); light irradiation (300 W Xe lamp, > 400 nm) (e) and (f).

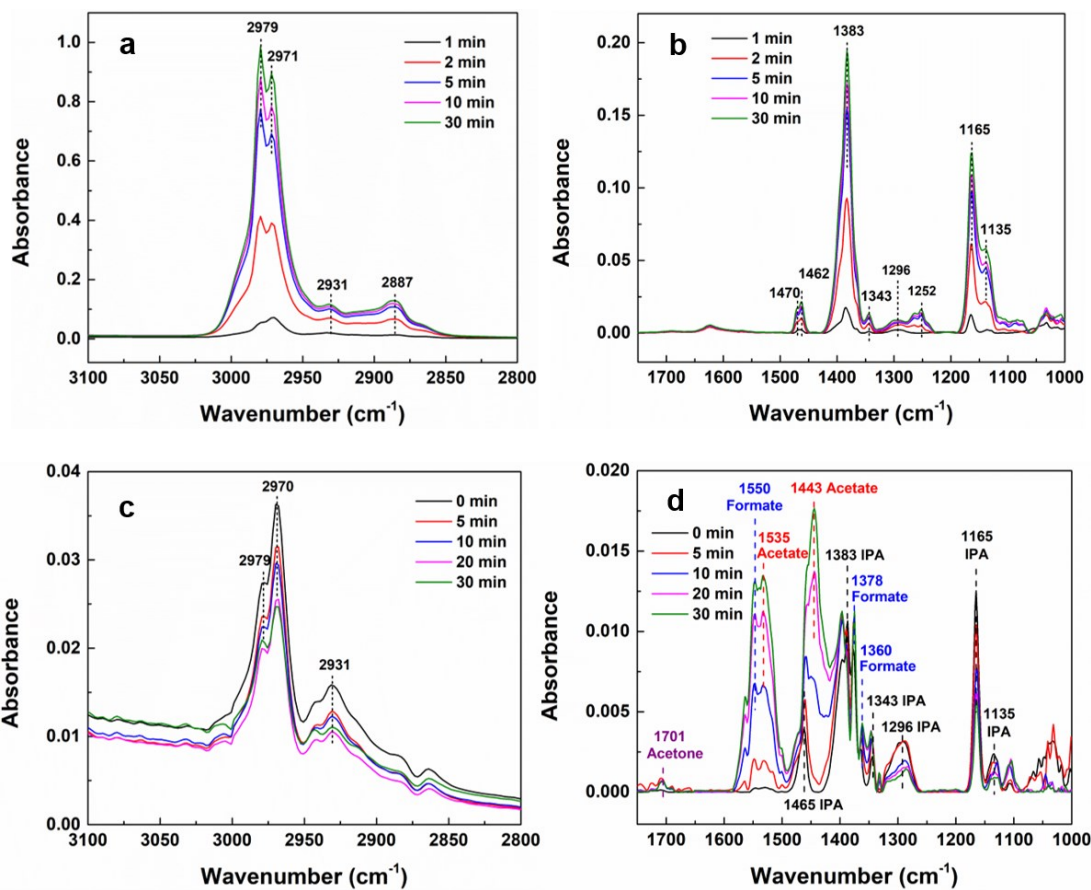

138  
 139 **Fig. S14** *In situ* DRIFTS spectra for  $\text{TiO}_{2-x}$ -35 min in the dark (a) and (b); under light irradiation (300 W Xe  
 140 lamp, > 400 nm) (c) and (d).  
 141

142 **Table S1.** The initial IPA, O<sub>2</sub>, H<sub>2</sub>O amount and their molar ratios under different reaction conditions  
 143

| Samples and reaction conditions                             | IPA amount (mmol) | O <sub>2</sub> amount (mmol) | H <sub>2</sub> O amount (mmol) | Molar ratio IPA : O <sub>2</sub> : H <sub>2</sub> O |
|-------------------------------------------------------------|-------------------|------------------------------|--------------------------------|-----------------------------------------------------|
| TiO <sub>2-x</sub> -4 min, 20 vol% O <sub>2</sub> , RH 0%   | 18                | 8929                         | 0                              | 1 : 496 : N/A                                       |
| TiO <sub>2-x</sub> -8 min, 20 vol% O <sub>2</sub> , RH 0%   | 18                | 8929                         | 0                              | 1 : 496 : N/A                                       |
| TiO <sub>2-x</sub> -20 min, 20 vol% O <sub>2</sub> , RH 0%  | 18                | 8929                         | 0                              | 1 : 496 : N/A                                       |
| TiO <sub>2-x</sub> -35 min, 20 vol% O <sub>2</sub> , RH 0%  | 18                | 8929                         | 0                              | 1 : 496 : N/A                                       |
| P25 TiO <sub>2</sub> , 20 vol% O <sub>2</sub> , RH 0%       | 18                | 8929                         | 0                              | 1 : 496 : N/A                                       |
| TiO <sub>2-x</sub> -20 min, 0 vol% O <sub>2</sub> , RH 0%   | 18                | 0                            | 0                              | 1 : N/A : N/A                                       |
| TiO <sub>2-x</sub> -20 min, 5 vol% O <sub>2</sub> , RH 0%   | 18                | 2232                         | 0                              | 1 : 124 : N/A                                       |
| TiO <sub>2-x</sub> -20 min, 35 vol% O <sub>2</sub> , RH 0%  | 18                | 15625                        | 0                              | 1 : 868 : N/A                                       |
| TiO <sub>2-x</sub> -20 min, 50 vol% O <sub>2</sub> , RH 0%  | 18                | 22322                        | 0                              | 1 : 1240 : N/A                                      |
| TiO <sub>2-x</sub> -20 min, 100 vol% O <sub>2</sub> , RH 0% | 18                | 44645                        | 0                              | 1 : 2480 : N/A                                      |
| TiO <sub>2-x</sub> -20 min, 20 vol% O <sub>2</sub> , RH 25% | 18                | 8929                         | 240                            | 1 : 496 : 13                                        |
| TiO <sub>2-x</sub> -20 min, 20 vol% O <sub>2</sub> , RH 50% | 18                | 8929                         | 480                            | 1 : 868 : 27                                        |
| TiO <sub>2-x</sub> -20 min, 20 vol% O <sub>2</sub> , RH 75% | 18                | 8929                         | 720                            | 1 : 868 : 40                                        |

144  
 145  
 146  
 147  
 148  
 149  
 150  
 151  
 152  
 153  
 154  
 155

**Table S2.** The specific surface area (SSA), phase composition and electronic properties of flame-made TiO<sub>2-x</sub> samples and P25.

| Sample                     | SSA (m <sup>2</sup> g <sup>-1</sup> ) | Rutile content (%) | CB potential (eV) | VB potential (eV) | Bandgap energy (eV) |
|----------------------------|---------------------------------------|--------------------|-------------------|-------------------|---------------------|
| TiO <sub>2-x</sub> -4 min  | 110.7                                 | 74.4               | -0.25             | 2.60              | 2.85                |
| TiO <sub>2-x</sub> -8 min  | 127.4                                 | 72.3               | -0.28             | 2.63              | 2.91                |
| TiO <sub>2-x</sub> -20 min | 130.8                                 | 78.5               | -0.27             | 2.68              | 2.95                |
| TiO <sub>2-x</sub> -35 min | 121.3                                 | 76.7               | -0.32             | 2.68              | 3.0                 |
| P25 TiO <sub>2</sub>       | 50.0                                  | 19.8               | -0.49             | 2.71              | 3.2                 |

156

157  
158  
159

**Table S3.** Quantitative defects analysis of flame-made TiO<sub>2-x</sub> using TPO measurement.

| Sample | O <sub>2</sub> consumption (μmol g <sup>-1</sup> ) |     |     |     | <i>x</i> (TiO <sub>2-x</sub> ) |
|--------|----------------------------------------------------|-----|-----|-----|--------------------------------|
|        | P1                                                 | P2  | P3  | P4  |                                |
| 4 min  | 250                                                | 89  | 98  | 277 | 0.114                          |
| 8 min  | 170                                                | 143 | 125 | 321 | 0.121                          |
| 20 min | 107                                                | 89  | 196 | 259 | 0.104                          |
| 35 min | 36                                                 | 54  | 36  | 143 | 0.043                          |
| P25    | 24                                                 | 0   | 24  | 0   | 0.008                          |

160  
161  
162  
163  
164  
165  
166  
167  
168  
169  
170  
171  
172  
173

**Table S4.** Photocatalytic activity of IPA degradation over flame-made TiO<sub>2-x</sub> and P25 with different light sources.

| Sample                     | Visible light irradiation |                                                        | UV-Vis irradiation           |                                                        |
|----------------------------|---------------------------|--------------------------------------------------------|------------------------------|--------------------------------------------------------|
|                            | Mineralization in 6 h (%) | CO <sub>2</sub> production rate (ppm h <sup>-1</sup> ) | Mineralization in 70 min (%) | CO <sub>2</sub> production rate (ppm h <sup>-1</sup> ) |
| TiO <sub>2-x</sub> -4 min  | 4.1                       | 8.2                                                    | 12.2                         | 125.1                                                  |
| TiO <sub>2-x</sub> -8 min  | 20.8                      | 41.7                                                   | 79.6                         | 818.6                                                  |
| TiO <sub>2-x</sub> -20 min | 22.7                      | 45.4                                                   | 98.8                         | 990                                                    |
| TiO <sub>2-x</sub> -35 min | 17.9                      | 35.9                                                   | 66.3                         | 682.3                                                  |
| P25 TiO <sub>2</sub>       | 8.8                       | 17.5                                                   | 53.2                         | 546.8                                                  |

174  
175

176 **Table S5.** Assignments of the IR bands in the spectra of the surface species on TiO<sub>2</sub>.  
 177

| Vibration mode                                    | Wavenumber (cm <sup>-1</sup> ) | Species |
|---------------------------------------------------|--------------------------------|---------|
| $\nu_{\text{as}} \text{CH}_3$                     | 2979, 2971                     | IPA     |
| $\nu_{\text{s}} \text{CH}_3$                      | 2931, 2866                     |         |
| $\nu_{\text{s}} \text{C} - \text{H}$              | 2887                           |         |
| $\delta_{\text{as}} \text{CH}_3$                  | 1470, 1465, 1462, 1450         |         |
| $\delta_{\text{s}} \text{CH}_3$                   | 1383                           |         |
| $\gamma_{\text{C} - \text{H}}$                    | 1343                           |         |
| $\delta_{\text{OH}}$                              | 1302, 1296, 1252               |         |
| $\nu_{\text{C} - \text{C}}$                       | 1165                           |         |
| $\nu_{\text{C} - \text{O}}$                       | 1135                           |         |
| $\nu_{\text{C} - \text{C}}, \gamma_{\text{CH}_3}$ | 1088, 1072                     |         |
| $\nu_{\text{C} = \text{O}}$                       | 1701, 1699                     | Acetone |
| $\delta_{\text{s}} \text{CH}_3$                   | 1387                           | Formate |
| $\nu_{\text{as}} \text{COO}$                      | 1553, 1550, 1565               |         |
| $\rho_{\text{COO}}$                               | 1412                           |         |
| $\delta_{\text{C} - \text{H}}$                    | 1378                           |         |
| $\nu_{\text{s}} \text{COO}$                       | 1360                           |         |
| $\nu_{\text{as}} \text{COO}$                      | 1535                           | Acetate |
| $\nu_{\text{s}} \text{COO}$                       | 1443, 1450                     |         |

178  
 179
